# Supplementary material
Source: PubMed Central journal article supplement (PMC4091641)
Supplement: NIHMS596862-supplement-1.pdf [file NIHMS596862-supplement-1.pdf]

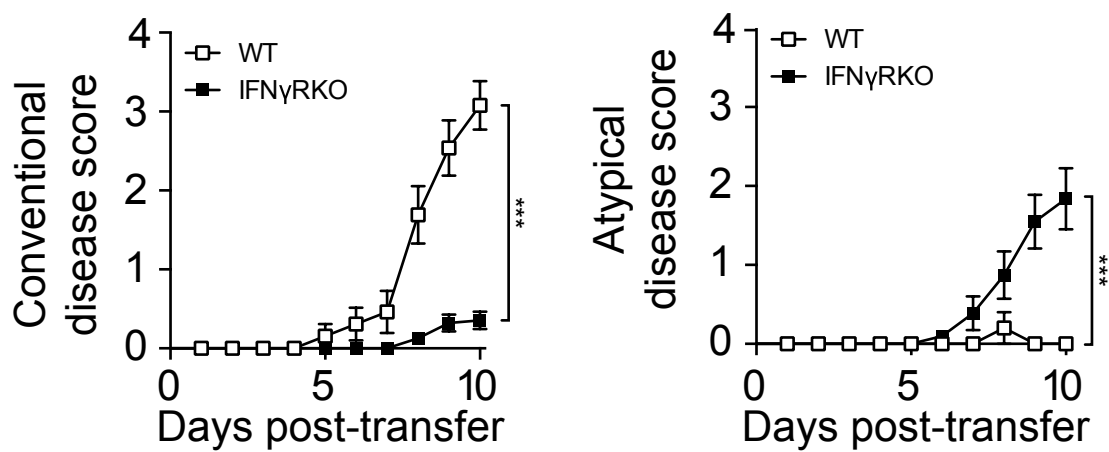

**Supplemental Figure 1:** Conventional and atypical disease scores for WT and IFN $\gamma$ RKO recipients of Th1-polarized MOG-primed CD4 T cells. WT n=14, IFN $\gamma$ RKO n=29.

**A**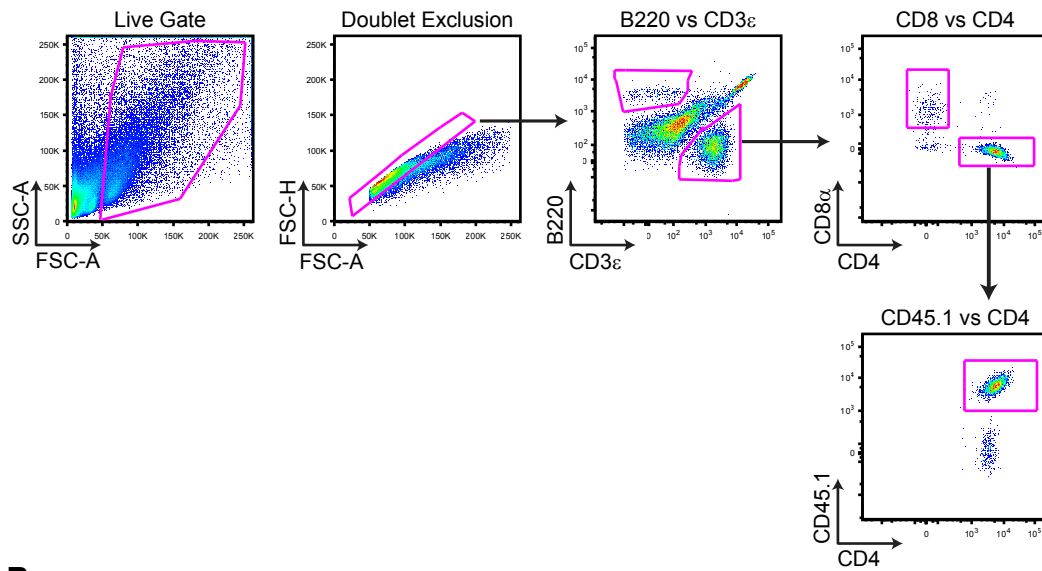**B**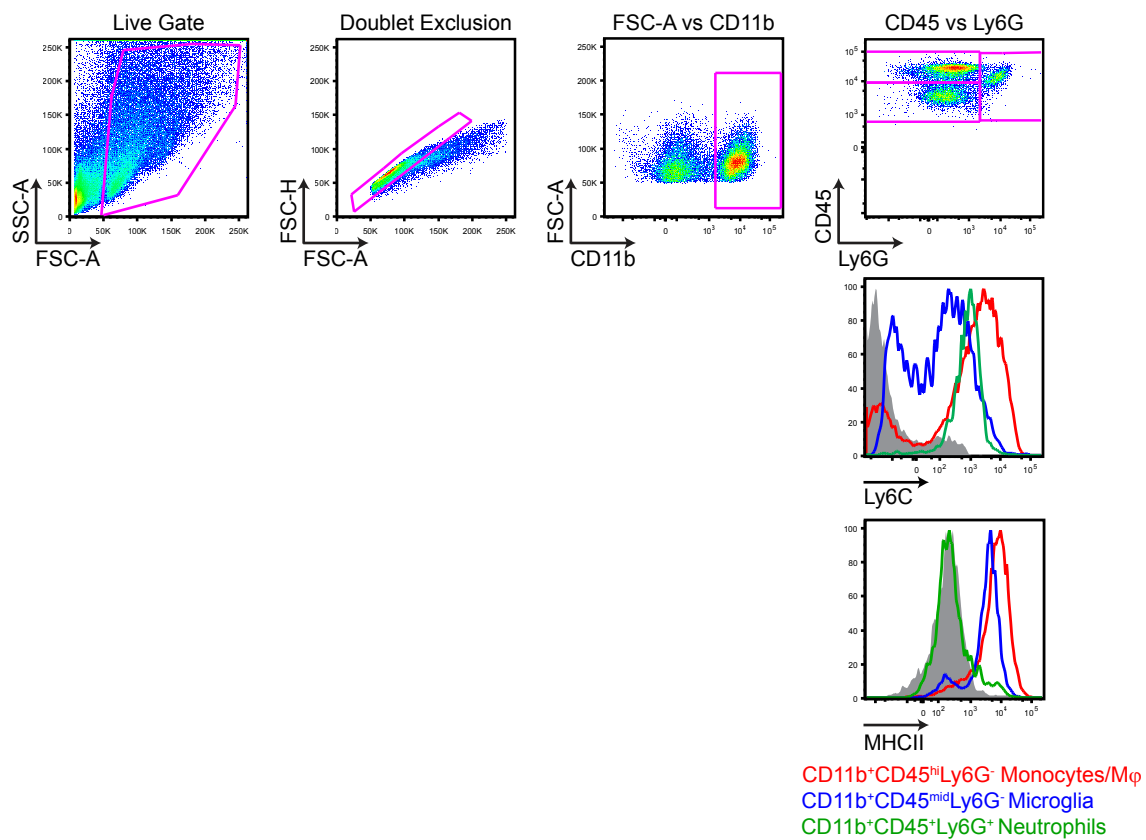

**Supplemental Figure 2** : Gating schemes for identifying myeloid and lymphoid cell subsets in CNS tissue. (a) Flow cytometry gating scheme for identifying donor CD4<sup>+</sup> T cell populations as B220<sup>+</sup>CD3 $\epsilon$ <sup>+</sup>CD4<sup>+</sup>CD45.1<sup>+</sup> cells. (b) Myeloid cells (CD11b<sup>+</sup>) were separated into microglia (CD45<sup>int</sup>Ly6G<sup>-</sup>), monocytes (CD45<sup>hi</sup>Ly6G<sup>-</sup>), and neutrophils (CD45<sup>+</sup>Ly6G<sup>+</sup>). MHCII and Ly6C expression were used to confirm phenotypes of microglia, monocytes and neutrophils.

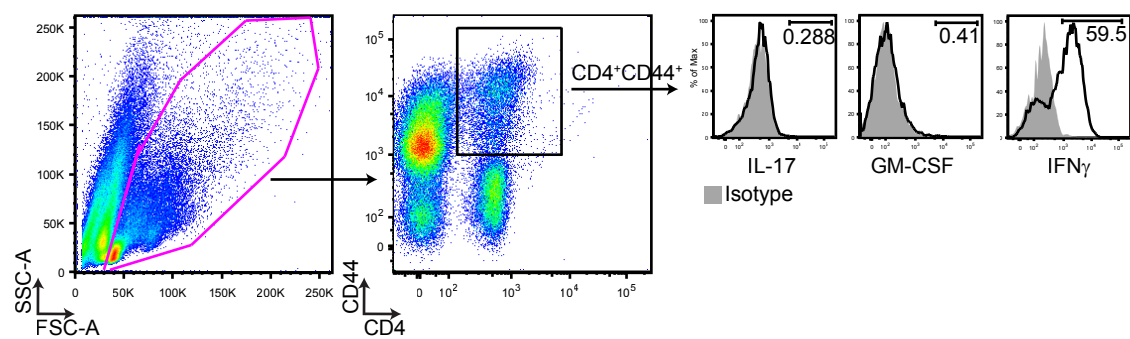

**Supplemental figure 3:** MOG<sub>35-55</sub>-primed, IL-12 polarized CD4 T cells were stimulated with PMA and ionomycin prior to intracellular staining and flow cytometric analysis. Histograms are gated on CD4<sup>+</sup>CD44<sup>+</sup> T cells.

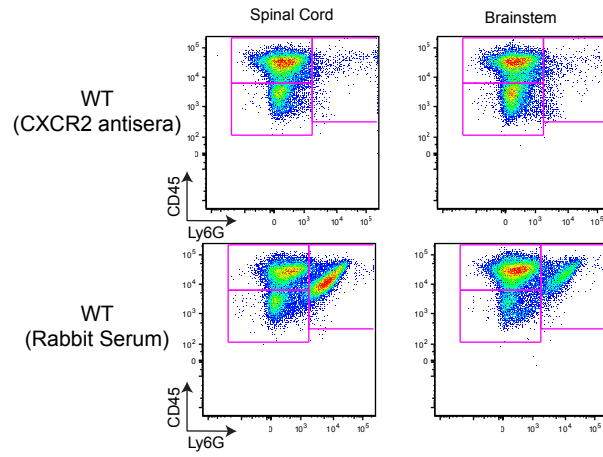

**Supplemental Figure 4:** Administration of CXCR2 antisera inhibits neutrophil accumulation in the spinal cord and brainstem in WT mice with EAE. Flow cytometric analysis of the spinal cord and brainstem isolated from score-matched mice d9 post-CD4<sup>+</sup> T cell transfer to examine neutrophil infiltration.
